# Supplementary material for: Metabolic Power Requirement of Change of Direction Speed in Young Soccer Players: Not All Is What It Seems
Source: PLOS journal article supplement (doi:10.1371/journal.pone.0149839), 2016-03-01
Supplement: S3 (10.1371/journal.pone.0149839.s003) [file journal.pone.0149839.s003]

**S3 Table. Sprints performance with (45° or 90°) or without one change of direction**

|           | Sprint time (s) |      |      |                   |
|-----------|-----------------|------|------|-------------------|
|           | SL              | 45°  | 90°  | 90° <sub>25</sub> |
| Player 1  | 2.98            | 3.32 | 3.66 | 4.46              |
| Player 2  | 2.91            | 3.49 | 3.83 | 4.22              |
| Player 3  | 3.05            | 3.36 | 3.58 | 4.21              |
| Player 4  | 2.88            | 3.20 | 3.65 | 4.16              |
| Player 5  | 2.94            | 3.36 | 3.72 | 4.45              |
| Player 6  | 2.89            | 3.27 | 3.86 | 4.22              |
| Player 7  | 2.65            | 3.27 | 3.51 | 3.93              |
| Player 8  | 2.98            | 3.48 | 3.79 | 4.45              |
| Player 9  | 3.02            | 3.25 | 3.97 | 4.47              |
| Player 10 | 2.83            | 3.27 | 3.74 | 4.05              |
| Player 11 | 2.66            | 3.08 | 3.42 | 4.12              |
| Player 12 | 2.90            | 3.26 | 3.69 | 4.24              |

SL: straight-line; COD: change of direction; 45°: 20-m sprint with one 45°-COD; 90°: 20-m

sprint with one 90°-COD; 90°<sub>25</sub>: 25-m sprint with one 90°-COD
