# Supplementary material for: Metabolic Power Requirement of Change of Direction Speed in Young Soccer Players: Not All Is What It Seems
Source: PLOS journal article supplement (doi:10.1371/journal.pone.0149839), 2016-03-01
Supplement: S6 (10.1371/journal.pone.0149839.s006) [file journal.pone.0149839.s006]

**S6 Table. Electromyography amplitude (RMS) of Biceps Femoris muscle during sprints with (45° or 90°) one change of direction**

|                  | Electromyographie amplitude (% RMS SL) |       |                   |
|------------------|----------------------------------------|-------|-------------------|
|                  | 45°                                    | 90°   | 90° <sub>25</sub> |
| <b>Player 1</b>  | 100.1                                  | 108.2 | 98.9              |
| <b>Player 2</b>  | 109.7                                  | 109.7 | 110.7             |
| <b>Player 3</b>  | 104.3                                  | 106.3 | 110.2             |
| <b>Player 4</b>  | 95.0                                   | 105.6 | 109.9             |
| <b>Player 5</b>  | 96.4                                   | 101.0 | 101.7             |
| <b>Player 6</b>  | 107.5                                  | 105.5 | 107.9             |
| <b>Player 7</b>  | 96.2                                   | 105.9 | 108.2             |
| <b>Player 8</b>  | 102.2                                  | 105.7 | 110.2             |
| <b>Player 9</b>  | 94.1                                   | 106.7 | 106.3             |
| <b>Player 10</b> | 108.6                                  | 105.5 | 105.0             |
| <b>Player 11</b> | 99.3                                   | 102.3 | 104.7             |
| <b>Player 12</b> | 107.1                                  | 109.2 | 97.7              |

SL: straight-line; COD: change of direction; 45°: 20-m sprint with one 45°-COD; 90°: 20-m sprint with one 90°-COD; 90°<sub>25</sub>: 25-m sprint with one 90°-COD; %RMS SL: percentage of straight-line sprint's electromyography amplitude
